# Supplementary material for: Cultural adaptation of the Safety Attitudes Questionnaire – Short Form (SAQ-SF) in Poland
Source: PubMed Central journal article supplement (PMC7864443; doi:10.1371/journal.pone.0246340), 2021-02-05
Supplement: pone.0246340.s001.pdf [file pone.0246340.s001.pdf]

# Postawy wobec bezpieczeństwa: Perspektywy personelu pracującego w danym obszarze opieki nad pacjentem (SAQ-SF PL)

Pracuję w (proszę określić obszar kliniczny lub obszar opieki nad pacjentem, w którym spędza Pan/Pani najwięcej czasu)

Jest to oddział: \_\_\_\_\_ Prosimy o wypełnienie ankiety w oparciu o własne doświadczenia w tym oddziale szpitalnym.

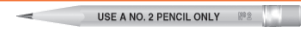

**Poprawnie zaznaczona odpowiedź**

**Niepoprawnie zaznaczona odpowiedź**

Nie dotyczy

Zdecydowanie się zgadzam

Raczej się zgadzam

Odpowiedź neutralna

Raczej się nie zgadzam

Zdecydowanie nie zgadzam się

Proszę odpowiedzieć na poniższe pytania odnosząc się do oddziału szpitalnego, w którym Pan/Pani pracuje.

Proszę wybrać odpowiedź używając poniższej skali:

| A                            | B                      | C                   | D                  | E                        | X           |
|------------------------------|------------------------|---------------------|--------------------|--------------------------|-------------|
| Zdecydowanie nie zgadzam się | Raczej się nie zgadzam | Odpowiedź neutralna | Raczej się zgadzam | Zdecydowanie się zgadzam | Nie dotyczy |

|                                                                                                                                                  |                |     |     |     |     |     |     |               |
|--------------------------------------------------------------------------------------------------------------------------------------------------|----------------|-----|-----|-----|-----|-----|-----|---------------|
| 1.Praca pielęgniarek w moim oddziale jest postrzegana pozytywnie.                                                                                | (A)            | (B) | (C) | (D) | (E) | (X) |     |               |
| 2.W tym oddziale trudno jest mówić otwarcie, jeśli dostrzegam problem dotyczący opieki nad pacjentem.                                            | (A)            | (B) | (C) | (D) | (E) | (X) |     |               |
| 3.Spory pojawiające się w oddziale są właściwie rozstrzygane (tj. z perspektywy tego, co jest najlepsze dla pacjenta, a nie tego, kto ma rację). | (A)            | (B) | (C) | (D) | (E) | (X) |     |               |
| 4.W opiece nad pacjentami otrzymuję od pozostałych członków zespołu wsparcie, którego potrzebuję.                                                | (A)            | (B) | (C) | (D) | (E) | (X) |     |               |
| 5.Członkowie zespołu nie mają problemów z zadawaniem pytań, jeśli czegoś nie rozumieją.                                                          | (A)            | (B) | (C) | (D) | (E) | (X) |     |               |
| 6.Lekarze i pielęgniarki tworzą dobrze skoordynowany zespół.                                                                                     | (A)            | (B) | (C) | (D) | (E) | (X) |     |               |
| 7.Czułbym/Czułabym się bezpiecznie, będąc leczony/a tu jako pacjent/pacjentka.                                                                   | (A)            | (B) | (C) | (D) | (E) | (X) |     |               |
| 8.W tym oddziale sprawy dotyczące zdarzeń niepożądanych są właściwie prowadzone.                                                                 | (A)            | (B) | (C) | (D) | (E) | (X) |     |               |
| 9.Wiem jak i do kogo kierować pytania dotyczące bezpieczeństwa pacjenta na tym oddziale.                                                         | (A)            | (B) | (C) | (D) | (E) | (X) |     |               |
| 10.Otrzymuję odpowiednie informacje zwrotne dotyczące mojej pracy.                                                                               | (A)            | (B) | (C) | (D) | (E) | (X) |     |               |
| 11.Na tym oddziale trudno jest dyskutować o błędach.                                                                                             | (A)            | (B) | (C) | (D) | (E) | (X) |     |               |
| 12.Moi koledzy zachęcają mnie do zgłaszania wszelkich wątpliwości dotyczących bezpieczeństwa pacjenta, jakie mi się nasuwają.                    | (A)            | (B) | (C) | (D) | (E) | (X) |     |               |
| 13.Kultura pracy na tym oddziale ułatwia uczenie się na błędach innych.                                                                          | (A)            | (B) | (C) | (D) | (E) | (X) |     |               |
| 14.Gdybym zgłosił/zgłosiła swoje sugestie dotyczące bezpieczeństwa kierownictwu, zostałyby one uwzględnione.                                     | (A)            | (B) | (C) | (D) | (E) | (X) |     |               |
| 15.Lubię moją pracę.                                                                                                                             | (A)            | (B) | (C) | (D) | (E) | (X) |     |               |
| 16.Praca tutaj, to jak bycie częścią dużej rodziny.                                                                                              | (A)            | (B) | (C) | (D) | (E) | (X) |     |               |
| 17.To dobre miejsce do pracy.                                                                                                                    | (A)            | (B) | (C) | (D) | (E) | (X) |     |               |
| 18.Jestem dumny/dumna z pracy na tym oddziale.                                                                                                   | (A)            | (B) | (C) | (D) | (E) | (X) |     |               |
| 19.Morale na tym oddziale są wysokie.                                                                                                            | (A)            | (B) | (C) | (D) | (E) | (X) |     |               |
| 20.Kiedy jestem przeciążony/przeciążona pracą, jakość pracy jest niższa.                                                                         | (A)            | (B) | (C) | (D) | (E) | (X) |     |               |
| 21.Jestem mniej efektywny/efektywna w pracy, kiedy jestem zmęczony/zmęczona.                                                                     | (A)            | (B) | (C) | (D) | (E) | (X) |     |               |
| 22.W sytuacji napięcia lub wrogości ryzyko, że popełnię błąd jest większe.                                                                       | (A)            | (B) | (C) | (D) | (E) | (X) |     |               |
| 23.Zmęczenie ma negatywny wpływ na moją pracę w nagłych przypadkach (np. reanimacja, atak padaczki).                                             | (A)            | (B) | (C) | (D) | (E) | (X) |     |               |
| 24.Kierownictwo wspiera mnie w codziennych wysiłkach*:                                                                                           | kier. oddziału | (A) | (B) | (C) | (D) | (E) | (X) | dyr. szpitala |
| 25.Kierownictwo nie naraża świadomie bezpieczeństwa pacjentów*:                                                                                  | kier. oddziału | (A) | (B) | (C) | (D) | (E) | (X) | dyr. szpitala |
| 26.Zarządzający wykonuje dobrze pracę*:                                                                                                          | kier. oddziału | (A) | (B) | (C) | (D) | (E) | (X) | dyr. szpitala |
| 27.Problemy personelu są rozwiązywane konstruktywnie przez*:                                                                                     | kier. oddziału | (A) | (B) | (C) | (D) | (E) | (X) | dyr. szpitala |
| 28.Otrzymuję terminowo odpowiednie informacje, które mogą mieć wpływ na moją pracę od*:                                                          | kier. oddziału | (A) | (B) | (C) | (D) | (E) | (X) | dyr. szpitala |
| 29.Poziom zatrudnienia personelu w oddziale jest odpowiedni w stosunku do liczby pacjentów.                                                      | (A)            | (B) | (C) | (D) | (E) | (X) |     |               |
| 30.Szpital prawidłowo szkoli nowy personel.                                                                                                      | (A)            | (B) | (C) | (D) | (E) | (X) |     |               |
| 31.Mam standardowo dostęp do wszystkich informacji niezbędnych do podejmowania decyzji diagnostycznych lub terapeutycznych.                      | (A)            | (B) | (C) | (D) | (E) | (X) |     |               |
| 32.Osoby szkolące się w moim zawodzie są odpowiednio nadzorowane.                                                                                | (A)            | (B) | (C) | (D) | (E) | (X) |     |               |
| 33.Moje doświadczenia współpracy z pielęgniarkami na tym oddziale są dobre.                                                                      | (A)            | (B) | (C) | (D) | (E) | (X) |     |               |
| 34.Moje doświadczenia współpracy z lekarzami na tym oddziale są dobre.                                                                           | (A)            | (B) | (C) | (D) | (E) | (X) |     |               |
| 35.Moje doświadczenia współpracy z farmaceutami na tym oddziale są dobre.                                                                        | (A)            | (B) | (C) | (D) | (E) | (X) |     |               |
| 36.Często występują zaburzenia komunikacji, prowadzące do opóźnień w zapewnieniu opieki.                                                         | (A)            | (B) | (C) | (D) | (E) | (X) |     |               |

## INFORMACJE DODATKOWE

Czy wypełnia/a Pan/Pani tę ankietę wcześniej?

Tak  Nie  Nie wiem

Dzisiejsza data (miesiąc/rok): \_\_\_\_\_

Zajmowane stanowisko: (Proszę zaznaczyć tylko jedną odpowiedź):

Prac.wsparcia med.\*\* (np. opiekun med., ratow. med., itd.)

Technolog/technik (zabiegowy, laboratoryjny, radiologiczny, itd.)

Pracownik wsparcia admin. (urzędnik/prac. sekretariatu, itd.)

Wsparcie środowiskowe (sanitariuszka, prac. firmy sprz., itd.)

Pozostałe funkcje kierownicze (np. kierownik kliniki)

Inne:.....

Lekkarz ordynator/Lekkarz etatowy

Dyplomowana pielęgniarka

Lekkarz specjalista na stażu naukowym

Farmaceuta

Lekkarz rezydent

Terapeuta (fizjoterapeuta, ter. zajęciowy)

Lekkarz/pielęgniarka z tytułem magistra

Kliniczny pracownik socjalny

Pielęgniarka oddziałowa/ zarządzająca

Dietetyk

Proszę zaznaczyć płeć:  Mężczyzna  Kobieta

Przeważająca grupa pacjentów:

Dorośli

Dzieci

Obie grupy

Doświadczenie zawodowe:  Poniżej 6 m-cy

6 do 11 m-cy

1 do 2 lat

3 do 4 lat

5 do 10 lat

11 do 20 lat

21 lat i więcej

**Diękujemy za wypełnienie ankiety – jesteśmy wdzięczni za udział w badaniu i poświęcony nam czas.**

**PROSZĘ NIE WYPEŁNIAĆ**

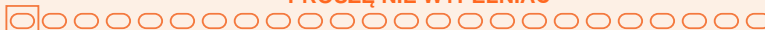

\* W pytaniach od 24 do 28 proszę o wyrażanie opinii zarówno w odniesieniu do kierownika oddziału jak i dyrektora szpitala.

\*\* Proszę o zakreślenie zajmowanego stanowiska pracy.

2017 Iwona Malinowska-Lipień, Uniwersytet Jagielloński-Collegium Medicum za zgodą The University of Texas at Austin
